# Supplementary material for: Lack of clinical AIDS in SIV-infected sooty mangabeys with significant CD4+ T cell loss is associated with double-negative T cells
Source: JCI journal article supplement (doi:10.1172/jci44876), 2011-02-16
Supplement: sd1 [file 1]

## Supplementary Information

**Supplementary Figure 1.**

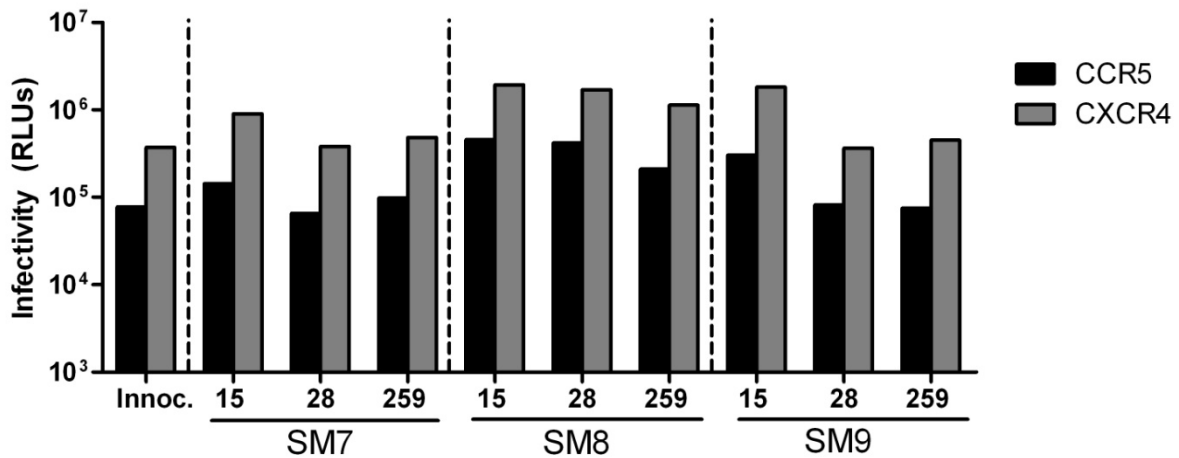

**Supplementary Figure 1.** SIVsmm multitropism is maintained following passage from one CD4-low SIV-infected mangabey (innoc.) to SM7, SM8, and SM9. SIVsmm tropism for the coreceptors CCR5 and CXCR4 as measured by a pseudovirus assay utilizing cloned viral *env* genes from each animal at 15, 28, and 259 days post passage.

**Supplementary Table 1.** Frequency of CD4<sup>+</sup>, CD8<sup>+</sup> and double-negative (DN) T cells within the CD3<sup>+</sup> T cell population.

|     |               | Blood   |         | Lymph Nodes |         | Bronchoalveolar Lavage |         | Rectal Biopsies |         |
|-----|---------------|---------|---------|-------------|---------|------------------------|---------|-----------------|---------|
|     |               | -60 dpi | 180 dpi | -60 dpi     | 180 dpi | -60 dpi                | 180 dpi | -60 dpi         | 180 dpi |
| SM7 | %CD4+ T cells | 22      | 1       | 40          | 0.68    | 14.1                   | 1.33    | 49              | 0.21    |
|     | %CD8+ T cells | 59      | 76      | 23.1        | 33.7    | 57.8                   | 56.1    | 12.8            | 17.3    |
|     | %DN T cells   | 17      | 21      | 34.2        | 65.1    | 27.3                   | 42.5    | 37.5            | 82.4    |
| SM8 | %CD4+ T cells | 23      | 1       | 45.2        | 0.90    | 13.8                   | 0.51    | 53.6            | 0.63    |
|     | %CD8+ T cells | 63      | 84      | 21.4        | 32.2    | 56.8                   | 66.3    | 22              | 26.5    |
|     | %DN T cells   | 13      | 15      | 30.7        | 66.6    | 28.4                   | 33.1    | 23.3            | 72.3    |
| SM9 | %CD4+ T cells | 45      | 2       | 51.9        | 0.68    | 22                     | 1.93    | 53.8            | 0.42    |
|     | %CD8+ T cells | 41      | 66      | 20          | 46.9    | 53.8                   | 62.6    | 22.3            | 24.7    |
|     | %DN T cells   | 13      | 31      | 24.8        | 52.2    | 23.5                   | 35.4    | 22.7            | 74.4    |

## Supplementary Figure 2.

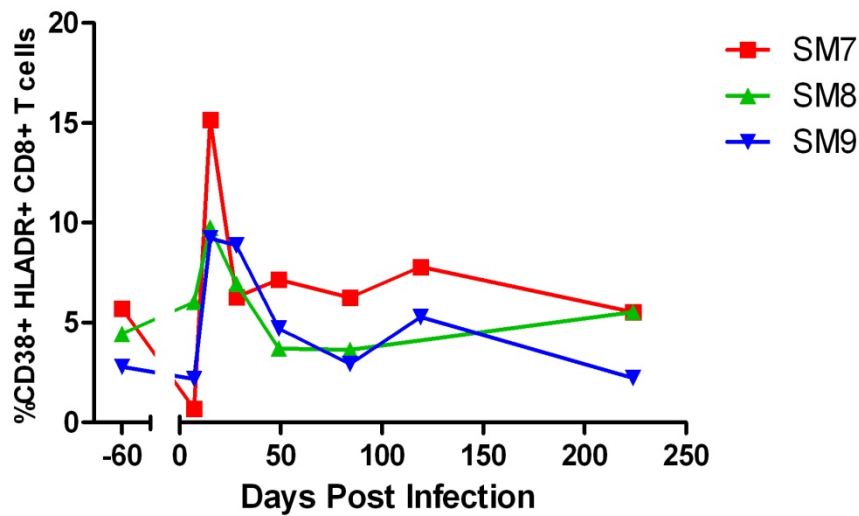

**Supplementary Figure 2.** CD8<sup>+</sup> T cell activation following passage of multitropic SIV to SM7, SM8, and SM9. Co-expression of the activation markers CD38 and HLA-DR on CD8<sup>+</sup> T cells was measured by multicolor flow cytometry in SM7, SM8, and SM9.

### Supplementary Figure 3.

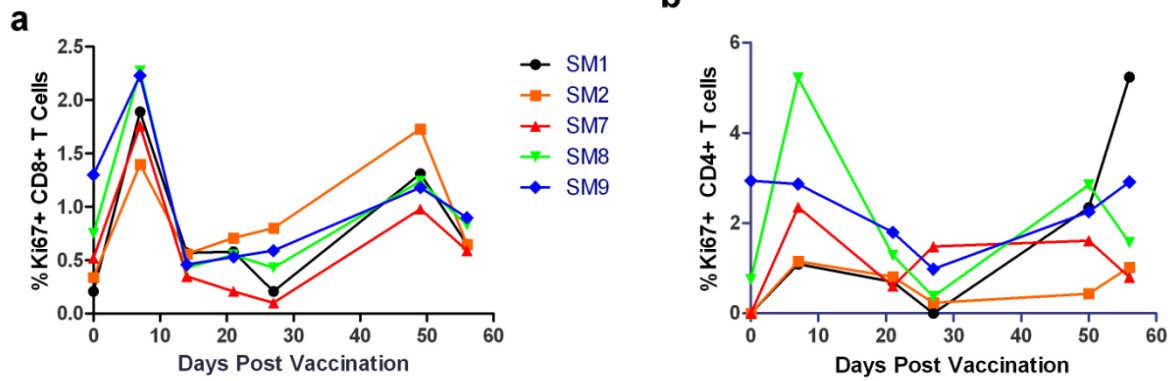

**Supplementary Figure 3.** Influenza vaccination results in transient increases in T cell proliferation in five SIV-infected CD4-low sooty mangabeys. **(a, b)** Proliferation of CD4<sup>+</sup> T cells **(a)** or CD8<sup>+</sup> T cells **(b)** as measured by Ki-67 expression following the first influenza vaccination in SM1, SM2, SM7, SM8, and SM9.

# Supplementary Figure 4.

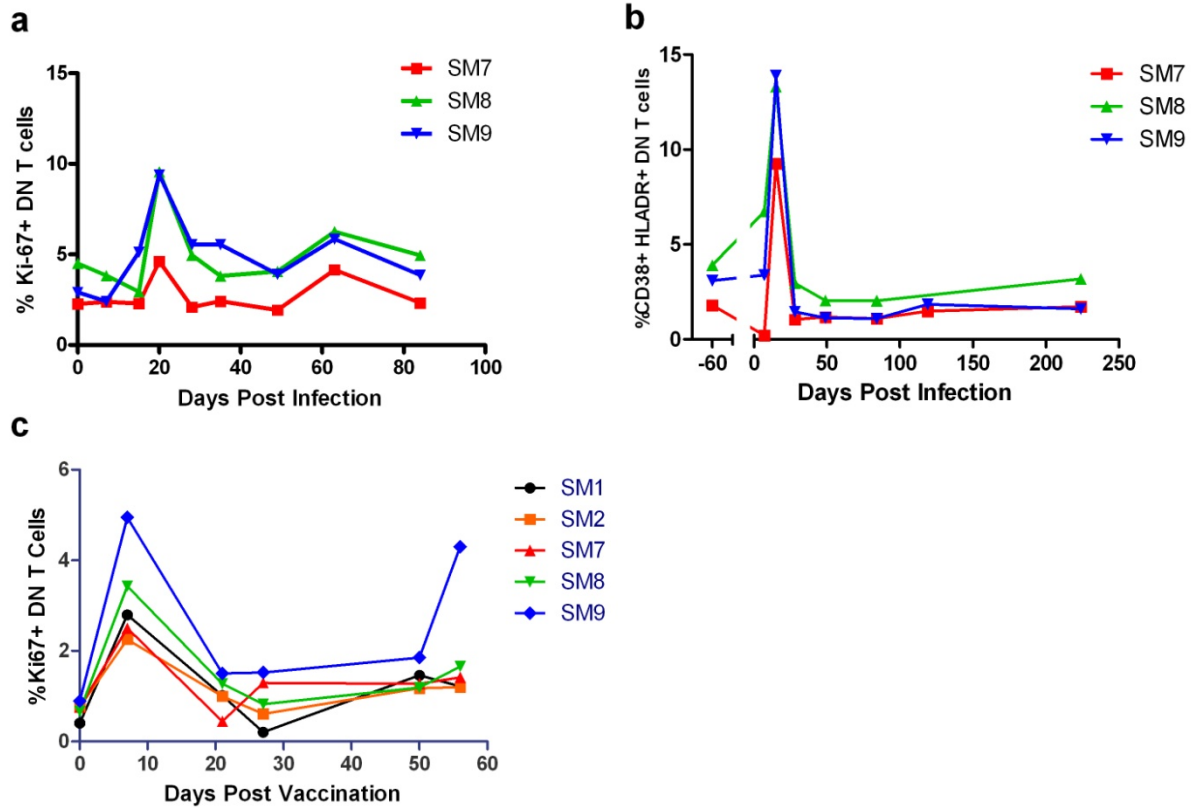

**Supplementary Figure 4.** Transient proliferation of DN T cells following SIV infection and influenza vaccination. **(a)** Proliferation of DN T cells as measured by Ki67 expression following SIV infection in SM7, SM8, and SM9. **(b)** Activation of peripheral blood DN T cells as measured by the co-expression of CD38 and HLA-DR following SIV infection in SM7, SM8, and SM9. **(c)** DN T cell proliferation following influenza vaccination in SM1, SM2, SM7, SM8, and SM9.
